# Supplementary material
Source: publisher site journal article supplement (https://www.dovepress.com/article/265998)
Supplement: Supplementary file 1 [file get_supplementary_file.php]

# Supplementary file

| Article                                                                                                                                                                                                                                                                                                                           | Points/issues addressed                                                                                                                                                                          | Theme                                         |
|-----------------------------------------------------------------------------------------------------------------------------------------------------------------------------------------------------------------------------------------------------------------------------------------------------------------------------------|--------------------------------------------------------------------------------------------------------------------------------------------------------------------------------------------------|-----------------------------------------------|
| Peng X, Xu X, Li Y, Cheng L, Zhou X, Ren H. <b>Transmission routes of 2019-nCoV and controls in dental practice.</b> <i>International Journal of Oral Science.</i> 2020 Mar 3;12(1):1-6.                                                                                                                                          | Characteristics of virus, 2) transmission in dental settings, 3) infection control protocol for dental settings, 4) Patient evaluation, 5) Infection, rubber dam use, pre-procedural mouth rinse | weaknesses, strengths                         |
| Meng L, Han B, Zhu Z. <b>Coronavirus Disease 2019 (COVID-19): Emerging and Future Challenges for Dental and Oral Medicine.</b> <i>J Dent Res.</i> 2020; DOI: 10.1177/0022032420361401.                                                                                                                                            | 1) virus characteristics, 2) infection control for dental settings, 3) Current Status their Hospital                                                                                             | weaknesses, strengths                         |
| Al-Ghani Y, Zhou X, Liu J, Tan J. <b>The Impact of the COVID-19 epidemic on the utilization of emergency dental services.</b> <i>Journal of Dental Science.</i> 2020(3).                                                                                                                                                          | 1) virus transmission, 2) survey investigators patients' dental visits                                                                                                                           | weaknesses, threats                           |
| Hamad MA, Juhari R, Ahmad N, Adam S, Alah M, Zaidi MS, Khoshdel Z. <b>Four and Practice Modifications among Dentists to Combat Novel Coronavirus Disease (COVID-19) Outbreak.</b> <i>International Journal of Environmental Research and Public Health.</i> 2020 Jan;17(6):2021.                                                  | 1) concerns, 2) fear of infection, 3) economic challenges                                                                                                                                        | weaknesses, threats                           |
| Culliford P. <b>Dentistry and coronavirus (COVID-19): remote dentistry.</b> <i>British Dental Journal.</i> 2020 Apr;228(7):610-614.                                                                                                                                                                                               | 1) Infection prevention, 2) remote consultations, 3) teleworking and employment                                                                                                                  | weaknesses, strengths, threats                |
| Ashford PG, Coates D, Henselwell B. <b>The outbreak of Novel Coronavirus Disease (COVID-19) caused a worrying delay in the diagnosis of oral cancer in north-west Italy: the Torino Metropolitan Area experience.</b> <i>Oral Diseases.</i> 2020 Apr 19.                                                                          | 1) consequences of lock down on dental facilities, 2) patient care                                                                                                                               | weaknesses, threats                           |
| Coutinho P. <b>The Oral Surgery Response to Coronavirus Disease COVID-19: Keep Calm and Carry On?</b> <i>Oral Surgery.</i> 2020 May.                                                                                                                                                                                              | 1) Infection control protocol, 2) preparedness of dental facilities, 3) consequences of lockdown                                                                                                 | weaknesses, threats                           |
| Filipe HR, Koyanagi SO, Zaccaro D, Kim SG, Chohan B. <b>Being a frontline dentist during the Covid-19 pandemic: a literature review.</b> <i>Maxillofacial Plastic and Reconstructive Surgery.</i> 2020 Dec;42:1-9.                                                                                                                | 1) transmission in dental settings, 2) patient's identification, 3) infection control protocol, 4) dentists' training                                                                            | weaknesses, strengths, threats                |
| Rezaei F. <b>Dental practice during a pandemic.</b> <i>KEJ Team.</i> 2020 Apr;7(4):20-24.                                                                                                                                                                                                                                         | 1) consequences of lock downs, 2) remote consultations, 3) teleworking, 4) concerns of dental team                                                                                               | weaknesses, strengths, opportunities          |
| Cassimatis PS, Townsend JA, Lind CS. <b>Endemic Dentistry During and After COVID-19.</b> <i>Public Dentistry.</i> 2020 Mar 15;42(2):67-80.                                                                                                                                                                                        | 1) risk associated with pandemic dental care, 2) oral care during covid, 3) oral prevention during covid, 4) patients' evaluation, 5) dealing with a pandemic patient                            | weaknesses, threats                           |
| Falstad MR, Stankovic SR. <b>The Regulation of Infection Control in Infection Control in Primary Dental Care.</b> 2020 (pp. 27-30). Springer, Cham.                                                                                                                                                                               | 1) Infection control protocols within dental settings                                                                                                                                            | weaknesses, strengths                         |
| Falstad MR, Stankovic SR. <b>The Concept of Documentation in Dentistry: Infection Control in Primary Dental Care in Dentistry.</b> 2020 (pp. 61-67). Springer, Cham.                                                                                                                                                              | 1) risk in dental settings, 2) concerns by dentists, 3) consequences of lockdown                                                                                                                 | weaknesses, threats                           |
| Wang H. <b>Wish a Pond of Care: Practice Dentistry in the Wake of COVID-19.</b> <i>Journal of Oral and Maxillofacial Surgery.</i> 2020(3).                                                                                                                                                                                        | 1) nature of the virus, 2) oral conditions/care in hospitalized covid patients                                                                                                                   | weaknesses, opportunities                     |
| Dobosz A, Wójcicka R. <b>The impact of coronavirus infection disease 19 (COVID-19) on oral health.</b> <i>Oral Dis.</i> 2020;60:1-4.                                                                                                                                                                                              | 1) preparedness of dental facilities                                                                                                                                                             | weaknesses, threats                           |
| Wu M, Cheng YQ. <b>COVID-19 and its implications in the management of resource infrastructure.</b> <i>Journal of Dental Sciences.</i> 2020 Apr 26.                                                                                                                                                                                | 1) economic challenges, 2) telemedicine, 3) Consultation, 4) Financial support                                                                                                                   | threats, opportunities                        |
| Fernández EM. <b>The financial impact of COVID-19 on oral practice.</b> <i>Journal of Oral and Maxillofacial Surgery.</i> 2020 Apr 9.                                                                                                                                                                                             | 1) challenges in dental care, 2) consequences of lockdown                                                                                                                                        | weaknesses, threats                           |
| Davies S. <b>COVID-19 pandemic: COVID-19 pandemic and the dental practice.</b> <i>N Am Dent J.</i> 2020 Apr;75(4):37-40.                                                                                                                                                                                                          | 1) transmission in dental settings, 2) patients' identification, 3) infection control protocol, 4) dentistry                                                                                     | weaknesses, threats, opportunities            |
| Alhar A, Paul R, Rajpal N, Dignato A, Rajgopal K. <b>Coronavirus Disease 19 (COVID-19): Implications for Clinical Dental Care.</b> <i>Journal of Endodontics.</i> 2020. 46: in press.                                                                                                                                             | 1) safety of dental personnel, 2) oral conditions associated with covid, 3) dental treatment during covid                                                                                        | weaknesses, strengths, threats                |
| Das Osho N, Bhatia R, Abu-Hamad S, Bhatia S, Abu-Hamad A, Abu-Hamad O. <b>COVID-19: Present and Future Challenges for Dental Practice.</b> <i>Int J Environ Res Public Health.</i> 2020, 17, 3151.                                                                                                                                | 1) transmission of virus, 2) role of dentists associated with covid, 3) infection control protocol                                                                                               | weaknesses, strengths                         |
| Kovacs S, Gendreau S, Wood NH, Malhotra PD. <b>COVID-19 pandemic and the dental practice.</b> <i>N Am Dent J.</i> 2020 Apr [ePub 2020 May 11]; 75(3):116-125. Available from: <a href="http://www.sciencedirect.com/science/article/pii/S0078180420300080">http://www.sciencedirect.com/science/article/pii/S0078180420300080</a> | 1) transmission of virus, 2) patients' identification, 3) oral health implications, 4) safety of dental care providers, 5) infection control protocol, 6) future recommendations                 | weaknesses, strengths, opportunities          |
| Rao YP, Rasthali L, Malhotra R, Elar E. <b>Dental care and oral health under the clouds of COVID-19.</b> <i>Oral Clinical &amp; Translational Research.</i> 2020 Apr 24;23(6):642-654.                                                                                                                                            | 1) dentists' concerns, 2) economic challenges, 3) economic support                                                                                                                               | weaknesses, strengths, opportunities          |
| Nawak K. <b>Modeling the Impact of COVID-19 on US Dental Spending.</b> <i>Chicago: Health Policy Institute/American Dental Association.</i> 2020.                                                                                                                                                                                 | 1) dental care during covid                                                                                                                                                                      | weaknesses, threats                           |
| Davis M, Savani N, Coulthard P. <b>Urgent dental care for patients during the COVID-19 pandemic.</b> <i>Lancet.</i> 2020 Apr 3;395(10221):2127.                                                                                                                                                                                   | 1) virus transmission, 2) infection control protocol, 3) patient's identification                                                                                                                | weaknesses, threats, strengths                |
| Isanti K, Ndi M, Galassi M, Gattuso F. <b>COVID-19 Transmission in Dental Practice: Brief Review of Preventive Measures in Italy.</b> <i>Journal of Dental Research.</i> 2020 Apr 17;102(4):2030-2040.                                                                                                                            | 1) safety of dental personnel, 2) role in dental settings, 3) avoid free dentistry                                                                                                               | weaknesses, threats, opportunities            |
| Bucanin H, Noldner R. <b>A Dental Response to the COVID-19 Pandemic-Safe Around? For Emergent (SAFE) Dentistry.</b>                                                                                                                                                                                                               | 1) consequences of lock downs, 2) remote consultations, 3) dental care during covid                                                                                                              | weaknesses, threats, opportunities            |
| Yang Y, Zhou Y, Liu X, Tan J. <b>Health service provision of 49 public tertiary dental hospitals during the COVID-19 epidemic in China.</b> <i>Clinical Oral Investigations.</i> 2020.                                                                                                                                            | 1) dental care during covid, 2) ethical obligations                                                                                                                                              | weaknesses, threats, opportunities            |
| Bullon-Bermejo Y, Levin L. <b>Dental literacy of adults in the COVID-19 era: why it doesn't hurt.</b> <i>Oral Health Pract.</i> 2020 Jun 1;18(2):95.                                                                                                                                                                              | 1) use of social media for oral screening and consultation                                                                                                                                       | opportunities                                 |
| Michalek RA, de Sousa NI, Oliveira RM, Junior EM, Basso FR. <b>Social media and telemedicine for oral diagnosis and consulting in the COVID-19 era.</b> <i>Oral Oncology.</i> 2020.                                                                                                                                               | 1) diffusion of dental services, 2) patients' identification, 3) patients' concerns                                                                                                              | weaknesses, threats                           |
| Yu J, Zhang T, Zhou D, Hengshu M, Shen Y. <b>Characteristics of Endodontic Emergencies during COVID-19 Outbreak in Wuhan.</b> <i>Journal of Endodontics.</i> 2020 Apr 10.                                                                                                                                                         | 1) nature of dental care, 2) telemedicine, 3) patients' privacy                                                                                                                                  | weaknesses, threats, opportunities            |
| Sakaji M, Shima K. <b>COVID-19 and Orthodontics—A Call for Action.</b> <i>American Journal of Orthodontics and Dental Orthopedics.</i> 2020 Apr 30.                                                                                                                                                                               | 1) uses of information technology                                                                                                                                                                | opportunities                                 |
| Jah T, Brannstrom MM, Berg RE, Farnes M, Williams T, Zilmanou NI. <b>Recent trends and future directions of dental research in the digital era.</b> <i>International Journal of Esthetic Dentistry.</i> 2020 Apr 20.                                                                                                              | 1) uses of information technology, 2) online screening and consultations                                                                                                                         | strengths, opportunities                      |
| Silva S, Silva R, Jardim AC, Siqueira WL. <b>Coronavirus COVID-19 impacts to dentistry and potential salivary diagnosis.</b> <i>Clinical Oral Investigations.</i> 2020 Feb 20:1-5.                                                                                                                                                | 1) virus as a diagnostic tool                                                                                                                                                                    | opportunities                                 |
| Guo YZ, Yang LM, Xu H, Fu XH, Zhang YL. <b>Possible aerosol transmission of COVID-19 and spatial prevention in dentistry.</b> <i>Journal of Zhejiang University-SCIENCE B.</i> 2020 Mar 14:4.                                                                                                                                     | 1) mode of transmission, 2) nature of dental care 2) infection control protocol                                                                                                                  | weaknesses, strengths                         |
| Seprençin, G. <b>COVID-19 outbreak: an overview on dentistry.</b> <i>COVID-19 outbreak: an overview on dentistry.</i> (2020) 2004.                                                                                                                                                                                                | 1) virus transmission, 2) infection control protocol, 3) risk to dental personnel                                                                                                                | weaknesses, threats                           |
| Al-Musa SA, Habboub E, Wakedansky S. <b>Impact of COVID-19 on the early detection of oral cancer: A special emphasis on high risk populations.</b> <i>Oral Oncology.</i> 2020 Mar 9.                                                                                                                                              | 1) diffusion of dental services, 2) patients' identification, 3) patients' concerns 4) impact of lockdown                                                                                        | weaknesses, threats                           |
| Mari D, Pagan OA, Vignas F. <b>Integration of telemedicine into the public health response to COVID-19 must include dentists.</b> <i>International Endodontic Journal.</i> 2020 Apr 7.                                                                                                                                            | 1) uses of information technology, 2) online screening and consultations, 3) required infrastructure and resources                                                                               | opportunities, threats                        |
| Malhotra SK, Innes NP, Raggio DP, Anjoji MP, Robinson MD, Jayaram J. <b>Coronavirus Disease (COVID-19): Characteristics in children and considerations for dentists providing their care.</b> <i>International Journal of Pediatric Dentistry.</i> 2020 Apr 6.                                                                    | 1) nature of child dental care, 2) differences in global recommendations, 3) knowledge and training of dentists, 4) safety of dental personnel                                                   | weaknesses, threats                           |
| Khadre V, Al-Nasser M, Al-Bayouh OB, Sadek R, Bhatia R, Alkhatib A, Al-Azari S, Bhatia R. <b>Anxiety, Awareness, Perception, and Attitude Regarding COVID-19 and Infection Control-Related Study Among Jordanian Dentists.</b> <i>ORF: Public Health and Services.</i> 2020;62(4):4796.                                           | 1) knowledge on training of dental personnel, 2) safety of dental personnel                                                                                                                      | weaknesses, threats                           |
| Sunac KC, Costello LK. <b>Dental infection prevention and recommendations during the COVID-19 pandemic.</b> <i>Int Dent.</i> 2020;17(2):77-83.                                                                                                                                                                                    | 1) infection control protocol, 2) ethical obligations                                                                                                                                            | strengths, threats                            |
| Fatouh I, Ali S. <b>COVID-19 outbreak and its monetary implications for dental practice, hospitals and healthcare workers.</b> <i>Portuguese Medical Journal.</i> 2020 Apr 3.                                                                                                                                                     | 1) consequences of lock downs, 2) economic challenges, 3) economic support                                                                                                                       | weaknesses, opportunities                     |
| Alharbi A, Alharbi S, Alqahtani S. <b>Guidelines for dental care provision during the COVID-19 pandemic.</b> <i>The Saudi Dental Journal.</i> 2020 Apr 7.                                                                                                                                                                         | 1) virus transmission, 2) infection control protocol, 3) patient's identification 4) provision of dental care during covid                                                                       | weaknesses, threats                           |
| Kumar SK, Sharma S, Thakur S, Srivastava D, Srivastava K, Das AJ, Choudhary A, Joshi R, Dhanraj K. <b>Assessing Knowledge, Attitudes and Practice of dental practitioners regarding the COVID-19 pandemic: a multicenter study.</b> <i>Dental and Medical Problems.</i> 2020 Apr 15;11(4):1-7.                                    | 1) dentists' knowledge and training, 2) facilities preparedness                                                                                                                                  | weakness, threats                             |
| Carallo L, Mancuso A, Cicchi M, Ossi G. <b>3D Printing beyond Dentistry during COVID-19 Epidemic: A Technical Note for Producing Connectors to Breathing Devices.</b> <i>Prosthodontics.</i> 2020 Jun 22;10(4):62.                                                                                                                | 1) role of dentists during covid                                                                                                                                                                 | strengths, opportunities                      |
| Guo Y, Hu X, He X. <b>Letter to the Editor: How to Deal with Suspended Oral Treatment during the COVID-19 Epidemic.</b> <i>Journal of Dental Research.</i> 2020 Apr 10;102(4):2429-2430.                                                                                                                                          | 1) dentists' training, 2) use of information technology,                                                                                                                                         | weaknesses, opportunities                     |
| Masandhi P, Masandhi SS. <b>Dental Care Management: The We Will Follow to Covid-19.</b> <i>European Journal of Medical Sciences.</i> 2020 May 4:2(3).                                                                                                                                                                             | 1) virus transmission, 2) spread in dental clinics, 3) infection control protocol                                                                                                                | weaknesses, strengths                         |
| Zimmerman M, Nuckels E. <b>Approaches to the management of patients in oral and maxillofacial surgery during COVID-19 pandemic.</b> <i>Journal of Crani-Maxillofacial Surgery.</i> 2020 Apr 6.                                                                                                                                    | 1) virus transmission, 2) preparedness of dental facilities, 3) infection control protocol, 4) dental care during covid                                                                          | weaknesses, strengths, threats                |
| Liu YH, Ash QS. <b>Strategies for Prevention of Coronavirus Disease 2019 in the Dental Field.</b> <i>Oral Diseases.</i> 2020 Apr 10.                                                                                                                                                                                              | 1) virus transmission, 2) infection control protocol                                                                                                                                             | weaknesses, strengths, threats                |
| Ali S, Zab U, Khan M, Mahmood A. <b>Transmission Routes and Infection Control of Novel Coronavirus-2019 in Dental Clinics-A Review.</b> <i>Journal of Islamabad Medical &amp; Dental College.</i> 2020 Mar 26;6(1):67-72.                                                                                                         | 1) mode of transmission, 2) nature of dental care, 3) infection control protocol,                                                                                                                | weaknesses, threats                           |
| Nazarian E, Pandey H, Luganillo F. <b>Dental emergency recommendations in SARS-CoV-2 infected cases.</b> <i>Forensic Science International.</i> 2020 May 4.                                                                                                                                                                       | 1) role of dentists, 2) infection control protocol                                                                                                                                               | strengths, threats                            |
| Panone R, Zambon T, Jorah J, Bryan-Cala C, Chen L, Dillon J. <b>Evaluation of COVID-19 Guidelines for University of Washington Oral and Maxillofacial Surgery Patient Care.</b> <i>Journal of Oral and Maxillofacial Surgery.</i> 2020 Apr 28.                                                                                    | 1) mode of transmission, 2) infection control protocol, 3) patient identification, 4) dentists' training                                                                                         | weaknesses, strengths, threats                |
| Guo Y, Yuan C, Wu C. <b>Emergency measures for acute oral mucosa disease during the outbreak of COVID-19.</b> <i>Oral Diseases.</i> 2020 Apr 11.                                                                                                                                                                                  | 1) impact of dental outbreak on oral health, 2) uses of information technology for screening and treatment                                                                                       | threats, opportunities                        |
| Srinivasan V, Margaret C, Vignas F, Rajpal N, Franchini G, Tomassini M, Grassini S. <b>Prevention and safety in the dental office after Novel Human Coronavirus outbreak: unaltered operations and future directions.</b> <i>Journal of Oromaxillofacial Surgery.</i> 2020 Apr 15:14-18.                                          | 1) consequences of dental personnel, 2) infection control protocol, 3) online triage, 4) notification and distribution during covid                                                              | weakness, strengths, opportunities            |
| Malhotra SK, Innes NP, Raggio DP, Anjoji MP, Robinson MD, Jayaram J. <b>Coronavirus Disease (COVID-19): Characteristics in children and considerations for dentists providing their care.</b> <i>International Journal of Pediatric Dentistry.</i> 2020 Apr 6.                                                                    | 3) Special characteristics of COVID-19 infection, 2) child patients in the dental setting, 3) difference in country recommendations, 4) telemedicine                                             | weaknesses, strengths, threats, opportunities |
| Sharma S, Kumar V, Chaitra A, Logani A. <b>Rapid detection of SARS-CoV-2 in saliva: Can an orofacialist take the lead in point-of-care COVID-19 testing?</b> <i>International Endodontic Journal.</i> 2020 Apr 28.                                                                                                                | 1) virus as a diagnostic tool                                                                                                                                                                    | opportunities                                 |
| Chen P, He J, Zhai K, Ke R. <b>Role of respiration in controlling the spread of Novel Coronavirus (Covid-19) among dental health care providers: a review.</b> <i>International Endodontic Journal.</i> 2020 May 7.                                                                                                               | 1) required PPE, 2) resources                                                                                                                                                                    | weaknesses, threats                           |
| Fu H. <b>What dentists need to know about COVID-19.</b> <i>Oral Oncology.</i> 2020 Apr 26:104741.                                                                                                                                                                                                                                 | 1) patient's identification, 2) COVID-19 transmission, 3) impact of the COVID-19 outbreak on dental services, 4) infection control protocol 5) saliva/nasal cavity for covid diagnosis           | weakness, strengths, threats, opportunities   |
| Mahar N, Tyagi S, Dastwal V, Nangay A, Tyagi P, Nish K. <b>DENTAL CONSIDERATIONS AMIDST COVID-19 SCARE.</b> <i>International Journal of Medical and Biomedical Studies.</i> 2020 Mar 21:403.                                                                                                                                      | 1) mode of transmission, 2) infection control protocol, 3) patient identification,                                                                                                               | weaknesses, strengths, threats                |
| Zhang S, Zheng S. <b>COVID-19 and dental practice: What has been done in China?</b>                                                                                                                                                                                                                                               | 1) mode of transmission, 2) nature of dental care, 3) impact of the covid on dental care                                                                                                         | weaknesses, strengths, threats                |
| Mawardi J, Shah K. <b>Safety &amp; Preventive Measures for Dental Health Care Professionals on COVID-19.</b>                                                                                                                                                                                                                      | 1) transmission, 2) infection control protocol, 3) safety of dental care personnel                                                                                                               | weaknesses, strengths, threats                |
| Yang Y, Jiao HY, Guo ZD, Peng X, Zhang Y, Guo CB. <b>Experiences of diagnosing and managing patients in oral maxillofacial surgery during the prevention and control period of the new coronavirus pneumonia.</b> <i>China J Dent Res.</i> 2020 Jan 12;23(1):7-12.                                                                | 1) dentists' activities, 2) dental care during covid, 3) infection during covid                                                                                                                  | weaknesses, strengths, threats                |
| <a href="https://doi.org/10.15388/1381-8637/2020001120200001">https://doi.org/10.15388/1381-8637/2020001120200001</a>                                                                                                                                                                                                             | 1) virus transmission, 2) impact on dental care, 3) recommendations by international organizations                                                                                               | weaknesses, threats                           |
| Sarrafzadeh TS, Panahi R, Amini H, Sillanpaa K, Sarrafzadeh M. <b>A review of salivary diagnostics and its potential implication in detection of Covid-19.</b> <i>Clinics.</i> 2020 Apr;124(4).                                                                                                                                   | 1) virus as a diagnostic tool                                                                                                                                                                    | opportunities                                 |
| Chen L, Zhou J, Peng J, Li X, Deng X, Qiang Z, Shan Z, Guo F, Zhang Q, Jin Y, Wang L. <b>Detection of 2019-nCoV in Saliva and Characteristics of Oral Symptoms in COVID-19 Patients.</b> Available at SSRN: 3556665. 2020 Mar 14.                                                                                                 | 1) virus as a diagnostic tool                                                                                                                                                                    | opportunities                                 |
| Kishorah DP, Kamesh S, Nishith C, Elar V, Madhan E. <b>Maxillofacial Trauma Management During COVID-19: Multidisciplinary Recommendations.</b> <i>Facial Plastic Surgery &amp; Aesthetic Medicine.</i> 2020 Apr 7.                                                                                                                | 1) managing dental trauma, 2) collaboration with other healthcare providers                                                                                                                      | strengths, threats                            |
| Huo CG, Liu ZQ, Wang Q, Yang Q, Xu QH, Zhang J. <b>Strategy of dental clinics to cope with the epidemic period of infectious diseases based on the experience of corona virus disease outbreak.</b> <i>Hua xi kong qing yu yan jiu: Wen Chuan journal of virology.</i> 2020 Apr 1;19(2):117.                                      | China's/Included                                                                                                                                                                                 |                                               |
| Bali, Robi Kusar, and Kati Chaudhry. <b>"Maxillofacial surgery and COVID-19: The Pandemic?"</b> (2020) : 1-3.                                                                                                                                                                                                                     | 1) impact of the COVID-19 outbreak on dental services 2) infection control protocol 3) saliva/nasal cavity for covid diagnosis 4) ethical obligations                                            | strengths, threats, weaknesses                |
| Ortiz-Salazar A. <b>COVID-19 and its impact on Precision dentistry.</b> <i>Revista Colombiana de Odontología.</i> 2020; 46(1): 40-43. DOI: 10.2142/2523-2754-0861-20200401                                                                                                                                                        | 1) impact on dental threats                                                                                                                                                                      | threats                                       |
| <a href="https://doi.org/10.1177/0959716220361401">https://doi.org/10.1177/0959716220361401</a>                                                                                                                                                                                                                                   | 1) prepared PPE and resources                                                                                                                                                                    | weaknesses, threats                           |
| Xu N, Yan L, Zhou B. <b>Depress and anxiety in dental clinics and prevention and control measures of infection.</b> <i>Zhonghua Kou Qiang Yi Xue Za Zhi.</i> 2020 Apr 10;55(4):404-408.                                                                                                                                           | China's/Included                                                                                                                                                                                 |                                               |
| Wang W, Jiang X. <b>Measures and suggestions for the prevention and control of novel coronavirus in dental institutions.</b> <i>Frontiers of Oral and Maxillofacial Medicine.</i> doi:10.11037/fomm.2020.02.01                                                                                                                    | 1) training of dental personnel, 2) online screening/consultations, 3) impact of covid on dental care 4) protocol for dental treatment                                                           | weaknesses, strengths, threats                |
| <a href="https://doi.org/10.11037/fomm.2020.02.01">https://doi.org/10.11037/fomm.2020.02.01</a>                                                                                                                                                                                                                                   | 1) recommendations for dental care during covid                                                                                                                                                  | weaknesses, threats                           |
| Wang Y, Zhou CC, Sha R, Zuo J. <b>Oral health management of children during the epidemic period of coronavirus disease 2019.</b> <i>Sichuan da xue xue bao. Yi xue ban: Journal of Sichuan University Medical Science Edition.</i> 2020 Mar 15;52(3):315-4. DOI: 10.13760/j.issn.1674-2205.2020030105.                            | China's/Included                                                                                                                                                                                 |                                               |
| <a href="https://doi.org/10.13760/j.issn.1674-2205.2020030105">https://doi.org/10.13760/j.issn.1674-2205.2020030105</a>                                                                                                                                                                                                           | 1) risk to dental personnel, 2) lack of resources, 3) telemedicine, 4) dentists' hygiene 5) protocol for oral care                                                                               | weaknesses, strengths, threats, opportunities |
| <a href="https://doi.org/10.13760/j.issn.1674-2205.2020030105">https://doi.org/10.13760/j.issn.1674-2205.2020030105</a>                                                                                                                                                                                                           | 1) virus as a diagnostic tool                                                                                                                                                                    | opportunities                                 |
| <a href="https://doi.org/10.13760/j.issn.1674-2205.2020030105">https://doi.org/10.13760/j.issn.1674-2205.2020030105</a>                                                                                                                                                                                                           | 1) virtual assistance, 2) patients' hygiene, 3) telemedicine care during covid                                                                                                                   | strengths, opportunities                      |
| Li ZY, Meng LY. <b>Prevention and control of novel coronavirus infection in department of otolaryngology.</b> <i>Zhonghua Kou Qiang Yi Xue Za Zhi: Chinese Journal of Stomatology.</i> 2020 Apr;55(4):217-222. DOI: 10.3760/j.issn.1674-2205.2020030105.                                                                          | China's/Included                                                                                                                                                                                 |                                               |
| <a href="https://doi.org/10.3760/j.issn.1674-2205.2020030105">https://doi.org/10.3760/j.issn.1674-2205.2020030105</a>                                                                                                                                                                                                             | 1) virus as a diagnostic tool, 2) oral conditions associated with covid, 3) transmission through saliva, 4) Comparison of saliva 2019-nCoV and SARS-CoV                                          | threats, opportunities                        |
| <a href="https://doi.org/10.3760/j.issn.1674-2205.2020030105">https://doi.org/10.3760/j.issn.1674-2205.2020030105</a>                                                                                                                                                                                                             | 1) impact of covid on dental practice                                                                                                                                                            | threats                                       |
| Tang HS, Yao ZD, Wang WM. <b>Emergency management of prevention and control of the novel coronavirus infection in department of otolaryngology.</b> <i>Zhonghua Kou Qiang Yi Xue An Zhonghua Journal of Stomatology.</i> 2020 Apr;55(4):246-248. DOI: 10.3760/j.issn.1674-2205.2020030105.                                        | China's/Included                                                                                                                                                                                 |                                               |
